# Supplementary material
Source: PubMed Central journal article supplement (PMC4433818)
Supplement: NIHMS679197-supplement-Suppl.pdf [file NIHMS679197-supplement-Suppl.pdf]

| Atom Type | Occurrences | Potential Contacts | Ratio |
|-----------|-------------|--------------------|-------|
| C5'_U     | 22          | 79                 | 3.591 |
| C2'_G     | 46          | 106                | 2.304 |
| C5_U      | 22          | 50                 | 2.273 |
| OP2_G     | 47          | 96                 | 2.043 |
| O2'_G     | 46          | 90                 | 1.957 |
| OP1_G     | 47          | 92                 | 1.957 |
| C4'_G     | 47          | 91                 | 1.936 |
| C5'_G     | 47          | 87                 | 1.851 |
| C1'_G     | 47          | 86                 | 1.830 |
| C3'_U     | 22          | 39                 | 1.773 |
| O2'_U     | 22          | 36                 | 1.636 |
| C5_G      | 48          | 78                 | 1.625 |
| O4_U      | 22          | 33                 | 1.500 |
| C4'_U     | 22          | 28                 | 1.273 |
| C6_U      | 22          | 28                 | 1.273 |
| N2_G      | 48          | 60                 | 1.250 |
| O3'_U     | 22          | 24                 | 1.091 |
| O5'_U     | 21          | 20                 | 0.952 |
| O3'_G     | 45          | 40                 | 0.889 |
| O4'_G     | 47          | 39                 | 0.830 |
| OP1_U     | 9           | 7                  | 0.778 |
| C2'_U     | 22          | 16                 | 0.727 |
| N3_G      | 48          | 31                 | 0.646 |
| O2_U      | 22          | 14                 | 0.636 |
| C3'_G     | 46          | 29                 | 0.630 |
| C1'_U     | 22          | 13                 | 0.591 |
| OP2_U     | 9           | 5                  | 0.556 |
| C4_U      | 22          | 11                 | 0.500 |
| N3_U      | 22          | 11                 | 0.500 |
| O5'_G     | 47          | 16                 | 0.340 |
| N1_U      | 22          | 7                  | 0.318 |
| C8_G      | 48          | 15                 | 0.312 |
| P_G       | 47          | 10                 | 0.213 |
| O4'_U     | 22          | 3                  | 0.136 |
| C2_G      | 48          | 5                  | 0.104 |
| C2_U      | 22          | 2                  | 0.091 |
| C6_G      | 48          | 2                  | 0.042 |
| C4_G      | 48          | 2                  | 0.042 |
| N7_G      | 48          | 1                  | 0.021 |
| N1_G      | 48          | 1                  | 0.021 |

Table 4: *Hydration index by atom type: for each atom type in structures P1A, P1B and P2C the number of occurrences of atoms of that type, the number of potential water contacts that have an atom of that type as target and the ratio of contacts to occurrences is shown. Potential contacts to modeled hydrogen atoms are credited to the atom to which the hydrogen is attached. Atoms with alternate conformations are excluded from the list of potential targets.*

| Group/Atom | Occurrence:Contacts | O              | Ca            | Sr            |
|------------|---------------------|----------------|---------------|---------------|
| backbone   | 372:412(1.11)       | 375 3.07(0.34) | 32 2.76(0.54) | 5 2.78(0.43)  |
| C5'        | 69 :43(0.62)        | 43 3.44(0.10)  | - -           | - -           |
| O3'        | 67 :79(1.18)        | 67 3.28(0.24)  | 9 2.66(0.48)  | 3 2.85(0.59)  |
| O5'        | 68 :36(0.53)        | 36 2.95(0.33)  | - -           | - -           |
| OP1        | 56 :120(2.14)       | 109 2.88(0.26) | 9 2.46(0.16)  | 2 2.66(0.04)  |
| OP2        | 56 :111(1.98)       | 105 2.97(0.33) | 6 2.32(0.07)  | - -           |
| P          | 56 :23(0.41)        | 15 3.48(0.09)  | 8 3.54(0.07)  | - -           |
| base       | 608:168(0.28)       | 163 3.21(0.30) | 3 2.80(0.63)  | 2 2.50(0.00)  |
| C2_G       | 48 :5(0.10)         | 5 3.55(0.03)   | - -           | - -           |
| C2_U       | 22 :2(0.09)         | 2 3.35(0.13)   | - -           | - -           |
| C4_G       | 48 :2(0.04)         | 2 3.52(0.09)   | - -           | - -           |
| C4_U       | 22 :13(0.59)        | 12 3.44(0.21)  | 1 3.52(-)     | - -           |
| C5_G       | 48 :1(0.02)         | 1 3.39(-)      | - -           | - -           |
| C5_U       | 22 :15(0.68)        | 15 3.45(0.12)  | - -           | - -           |
| C6_G       | 48 :2(0.04)         | 2 3.46(0.05)   | - -           | - -           |
| C6_U       | 22 :11(0.50)        | 11 3.35(0.15)  | - -           | - -           |
| C8_G       | 48 :2(0.04)         | 2 3.51(0.00)   | - -           | - -           |
| N1_G       | 48 :1(0.02)         | 1 3.46(-)      | - -           | - -           |
| N1_U       | 22 :7(0.32)         | 7 3.51(0.07)   | - -           | - -           |
| N2_G       | 48 :20(0.42)        | 20 3.29(0.20)  | - -           | - -           |
| N3_G       | 48 :31(0.65)        | 31 3.08(0.26)  | - -           | - -           |
| N3_U       | 22 :2(0.09)         | 2 3.40(0.25)   | - -           | - -           |
| N7_G       | 48 :1(0.02)         | 1 3.51(-)      | - -           | - -           |
| O2_U       | 22 :14(0.64)        | 14 3.01(0.24)  | - -           | - -           |
| O4_U       | 22 :39(1.77)        | 35 2.95(0.26)  | 2 2.44(0.06)  | 2 2.50(0.00)  |
| furanose   | 411:304(0.74)       | 287 3.17(0.30) | 14 3.21(0.38) | 3 3.03(0.47)  |
| C1'        | 69 :38(0.55)        | 38 3.36(0.09)  | - -           | - -           |
| C2'        | 68 :57(0.84)        | 52 3.31(0.13)  | 5 3.59(0.01)  | - -           |
| C3'        | 68 :15(0.22)        | 11 3.43(0.15)  | 3 3.33(0.23)  | 1 3.58(-)     |
| C4'        | 69 :18(0.26)        | 18 3.49(0.08)  | - -           | - -           |
| O2'        | 68 :134(1.97)       | 126 2.98(0.30) | 6 2.85(0.24)  | 2 2.76(0.04)  |
| O4'        | 69 :42(0.61)        | 42 3.23(0.24)  | - -           | - -           |
| solvent    | 221:529(2.39)       | 473 2.94(0.35) | 35 2.52(0.25) | 21 2.59(0.10) |
| CA         | 3 :7(2.33)          | 7 2.50(0.19)   | - -           | - -           |
| O          | 201:502(2.50)       | 446 2.97(0.35) | 35 2.52(0.25) | 21 2.59(0.10) |
| SR         | 17 :20(1.18)        | 20 2.62(0.22)  | - -           | - -           |

Table 5: *Solvent contact distances: the distribution of solvent contacts across all structures examined. Each non-bonding contact links a solvent ion/water, with full or partial occupancy, and a target atom. Target atoms are grouped into four classes, only those with full occupancy are considered. The number of occurrences of atoms of that type, the number of contacts to such atoms, and the average number of contacts per atom across all structures are shown in the first column. The three columns on the right show the number of contacts and the average and standard deviation of the contact distance for HOH, Ca, and Sr respectively.*

|      | $\alpha$    | $\beta$      | $\gamma$   | $\delta$   | $\epsilon$  | $\zeta$     | $\chi$      |
|------|-------------|--------------|------------|------------|-------------|-------------|-------------|
| U1   |             |              | 52.8(1.3)  | 79.2(1.2)  | -155.7(3.5) | -89.5(1.7)  | -145.2(2.6) |
| G2   | -97.0(1.5)  | 63.8(3.0)    | 175.7(1.8) | 82.9(1.7)  | -153.1(2.4) | -71.7(2.3)  | -167.2(1.8) |
| G3   | -69.0(2.2)  | -171.3(3.0)  | 59.5(1.2)  | 149.7(1.4) | -170.0(1.8) | -117.6(1.4) | -120.8(1.8) |
| G4   | -77.0(1.6)  | 176.3(1.3)   | 45.6(1.2)  | 76.0(0.7)  | -151.8(3.5) | -74.2(3.7)  | -154.6(1.4) |
| G5-A | -67.1(3.5)  | 138.2(105.6) | 50.5(1.4)  | 80.4(3.7)  | -158.3(2.9) | 59.5(5.5)   | -148.7(1.9) |
| G5-B | -71.4       | 175.8        | 50.4       | 75.9       | -152.5      | -78.7       | -148.8      |
| G5-C | -69.2       | 174.4        | 49.0       | 75.8       | -163.5      | 43.0        | -148.9      |
| U6-A | 154.8(16.6) | 151.8(7.3)   | 54.7(14.2) | 141.8(2.5) |             |             | -135.2(4.2) |
| U6-B | -62.1       | 171.6        | 64.1       | 122.5      |             |             | -130.8      |
| U6-C | 73.0        | 176.0        | 52.2       | 90.6       |             |             | -159.4      |

Table 6: *Torsion angles. Torsion angles averaged over twelve chains from structures P1A, P1B and P2C [47]. For residues G5 and U6, angles are computed separately for conformations 3'U-A (ten chains), 3'U-B and 3'U-C (one chain each).*
